# Supplementary material for: Peroxiredoxin 6 Applied after Exposure Attenuates Damaging Effects of X-ray Radiation in 3T3 Mouse Fibroblasts
Source: MDPI journal article supplement (doi:10.3390/antiox10121951), 2021-12-05
Supplement: s1 [file s1]

Table S1. Oligonucleotides used for real-time PCR.

| Gene                | GenBank     | Primer Sequence                                           | Localization           |
|---------------------|-------------|-----------------------------------------------------------|------------------------|
| <i>ACTB</i>         | NM_007393.4 | F: CCTTCCTTCTTGGGTATGGAATCC<br>R: CACCAGACAGCACTGTGTTGGCA | 899-922<br>1013-991    |
| <i>NRF2</i>         | NM_010902   | F: CTCGCTGGAAAAAGAAGTG<br>R: CCGTCCAGGAGTTCAGAGG          | 4260-4278<br>4499-4482 |
| <i>NF-κB (p65)</i>  | NM_009045.5 | F: CCAGACACAGATGATCGCCA<br>R: CGGGGTTCAGTTGGTCCATT        | 1162-1181<br>1268-1249 |
| <i>c-JUN (AP-1)</i> | NM_010591   | F: CACGGAGAAGAAGCTCACAA<br>R: ACTTGTTACCGGTCCTCTGG        | 240-259<br>365-346     |
| <i>CASP-3</i>       | NM_009810   | F: AAGGAGCAGCTTTGTGTGTG<br>R: GAAGAGTTTCGGCTTTCCAG        | 556-575<br>700- 681    |
| <i>TP53</i>         | NM_011640.3 | F: CGAAGACTGGATGACTGCCA<br>R: CGTCCATGCAGTGAGGTGAT        | 148-167<br>284-265     |
| <i>CDKN1A</i>       | NM_007669.5 | F: GTCTTGCACTCTGGTGTCTGA<br>R: TAGAAATCTGTCAAGGCTGGTCT    | 443-463<br>541- 520    |
| <i>IL-6</i>         | NM_031168   | F: TAGTCCTTCTACCCCAATTTCC<br>R: TTGGTCCTTAGCCACTCCTTC     | 566-588<br>641-621     |
| <i>TLR1</i>         | NM_030682.2 | F: GCCAAACGCAAACCTTACCAG<br>R: AGCTTGGACAATGAGAGGATGT     | 270-290<br>389-368     |
| <i>TLR2</i>         | NM_011905.3 | F: CTACATTGGCCATGGTGACCT<br>R: TGCCCAGAGAATAAAAAGGCGT     | 547-567<br>653-633     |
| <i>TLR4</i>         | NM_021297.3 | F: CCCTGCATAGAGGTAGTTCCTAA<br>R: CTTCAAGGGGTTGAAGCTCAGAT  | 360-382<br>479-457     |
| <i>XRCC4</i>        | NM_028012   | F: GAGACACCGAATGCAGAAGA<br>R: GGTGCTCTCCTCTTTCAAGG        | 920-939<br>1040-1021   |
| <i>XRCC5</i>        | NM_009533   | F: GAAGAACAGCGCTTCAACAG<br>R: TCCTGAACAACAATTTCCCA        | 2080-2099<br>2171-2152 |
| <i>Ogg1</i>         | NM_010957.4 | F: AGATTGCCCATCGTGACTACG<br>R: TCCGGAAAAAGTTTCCAGTTC      | 1068-1088<br>1163-1142 |
| <i>Apex1</i>        | NM_009687.2 | F: GGTCAGCTCCGTCAGACAAA<br>R: TCCTCGCCAATGCCATAAGA        | 491-510<br>581-562     |
| <i>H2AX</i>         | NM_010436.2 | F: TCAGGAGTACTGAGGGGGC<br>R: TGGCTCAGCTCTTTCTGTGAG        | 467-485<br>571- 551    |
| <i>HSP70</i>        | NM_024172   | F: CACGTTGACGTGTCCATCCTG<br>R: ACCAGCCGGTTGTGCAAGTCCT     | 615-636<br>719-698     |
| <i>HSP90</i>        | NM_011631   | F: GTCCGCCGTGTGTTTCATCAT<br>R: GCACTTCTTGACGATGTTCTTGC    | 1164-1183<br>1331-1309 |
| <i>SOD3</i>         | NM_011435   | F: CTGAGGACTTCCCAGTGAC<br>R: GGTGAGGGTGTGACAGTGT          | 1456-1473<br>1651-1634 |
| <i>PRDX1</i>        | NM_011034   | F: AATGCAAAAATTGGGTATCCTGC<br>R: CGTGGGACACACAAAAGTAAAGT  | 86-108<br>235-213      |
| <i>PRDX2</i>        | NM_011563   | F: CACCTGGCGTGGATCAATACC<br>R: GACCCCTGTAAGCAATGCCC       | 390-410<br>556-537     |

|              |             |                                                          |                    |
|--------------|-------------|----------------------------------------------------------|--------------------|
| <i>PRDX3</i> | NM_007452   | F: GGTGCTCGTCATGCAAGTG<br>R: CCACAGTATGTCTGTCAAACAGG     | 107-126<br>206-184 |
| <i>PRDX4</i> | NM_016764   | F: CTCAAACTGACTGACTATCGTGG<br>R: CGATCCCCAAAAGCGATGATTTC | 408-430<br>508-486 |
| <i>PRDX5</i> | NM_012021   | F: GGCTGTTCTAAGACCCACCTG<br>R: GGAGCCGAACCTTGCCTTC       | 772-792<br>925-907 |
| <i>PRDX6</i> | NM_177256.5 | F: TAAGGACAGGGACATTTCCATCC<br>R: CCGTGGAGTTAGGGTAGAGGA   | 694-716<br>839-819 |
